# Supplementary material for: Tumor PKCδ instigates immune exclusion in EGFR-mutated non–small cell lung cancer
Source: Springer Nature journal article supplement (doi:10.1186/s12916-022-02670-0), 2022-12-08

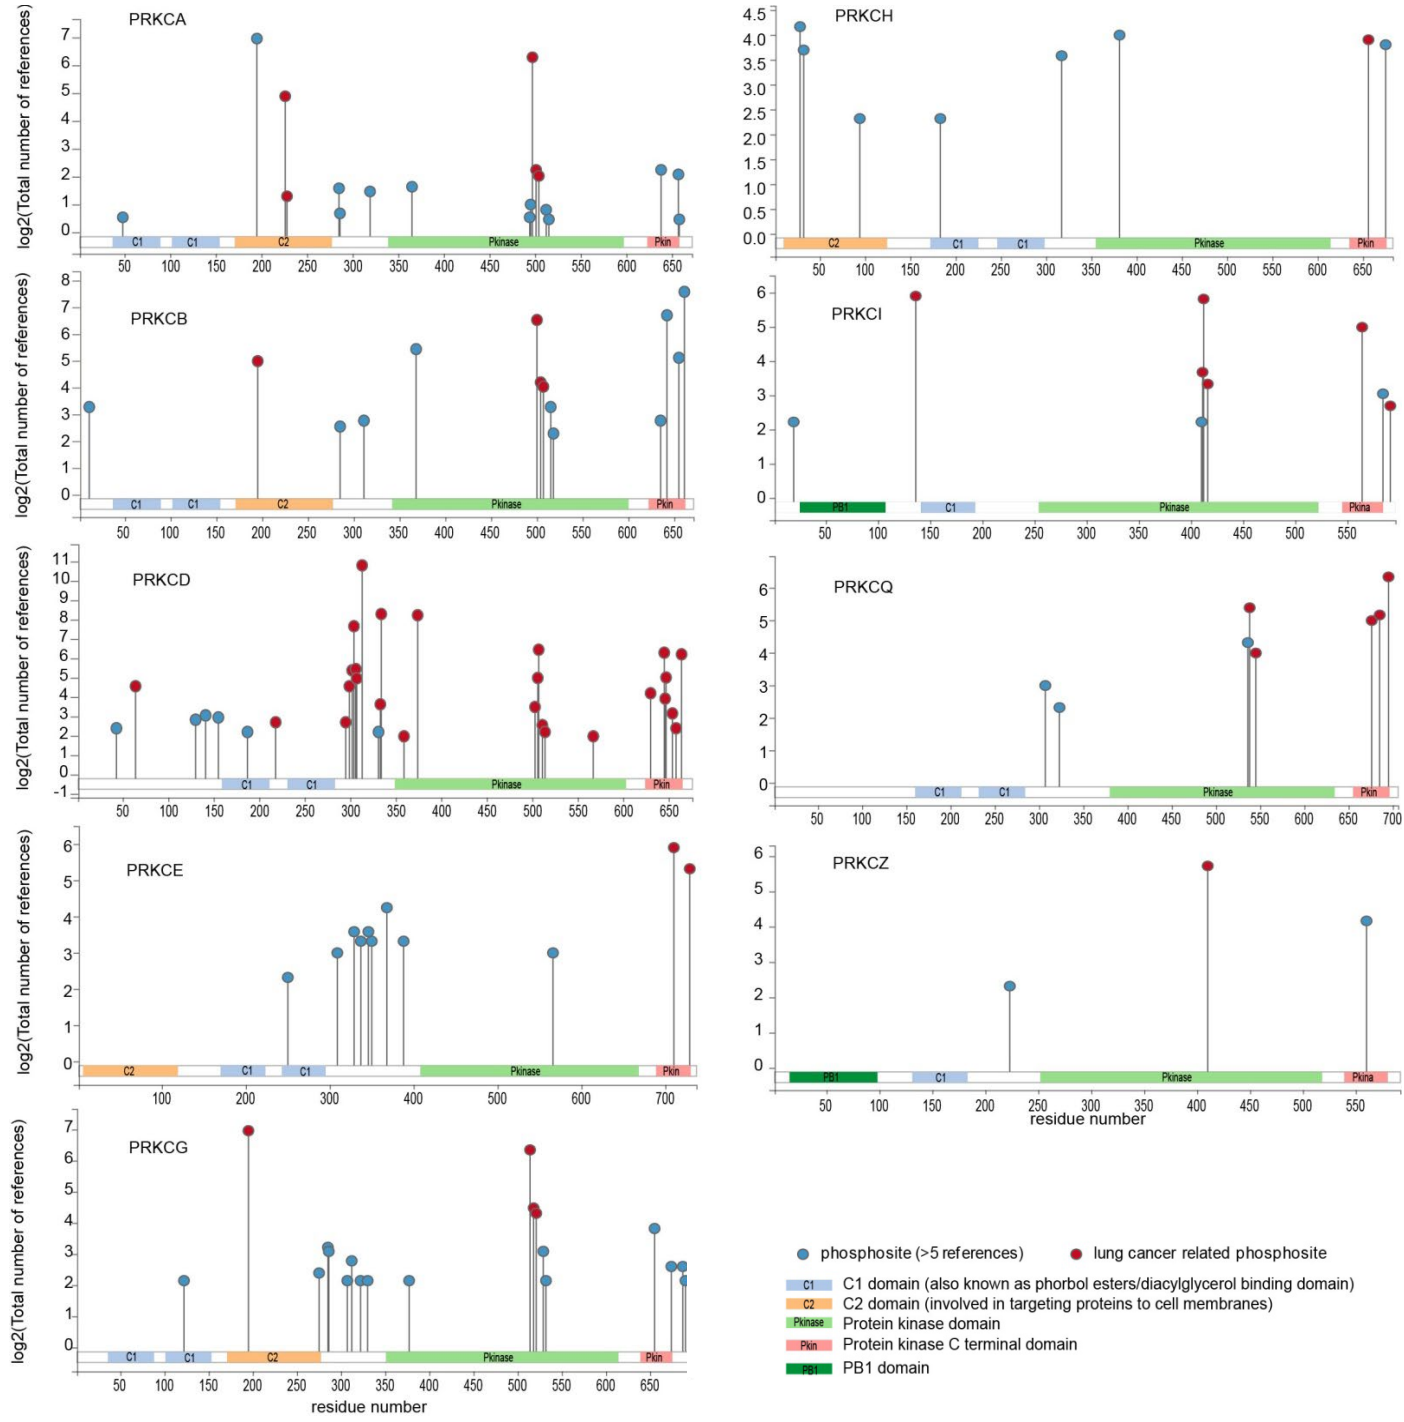

**A**

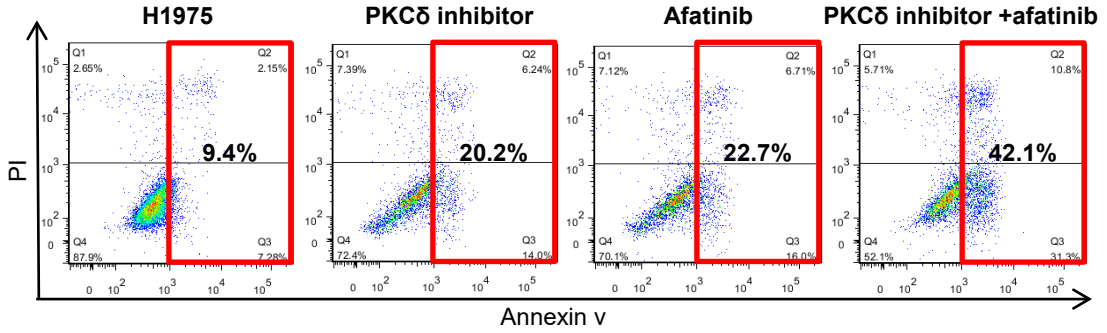

**B**

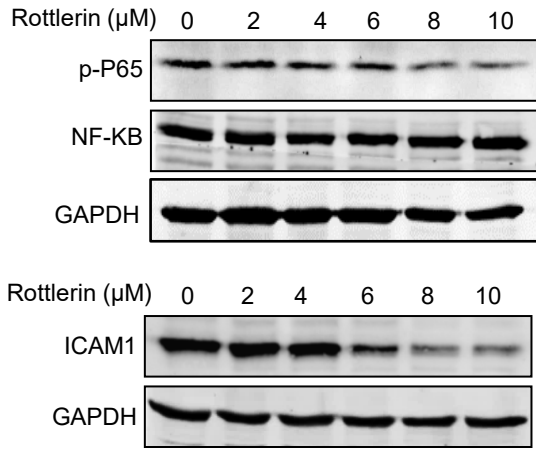

**C**

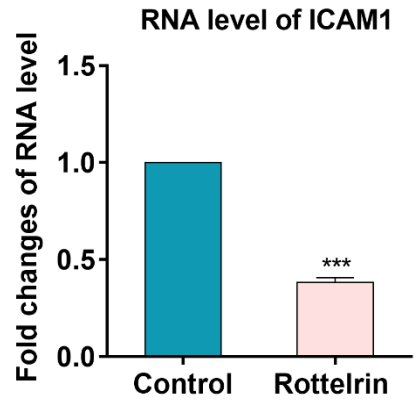

**D**

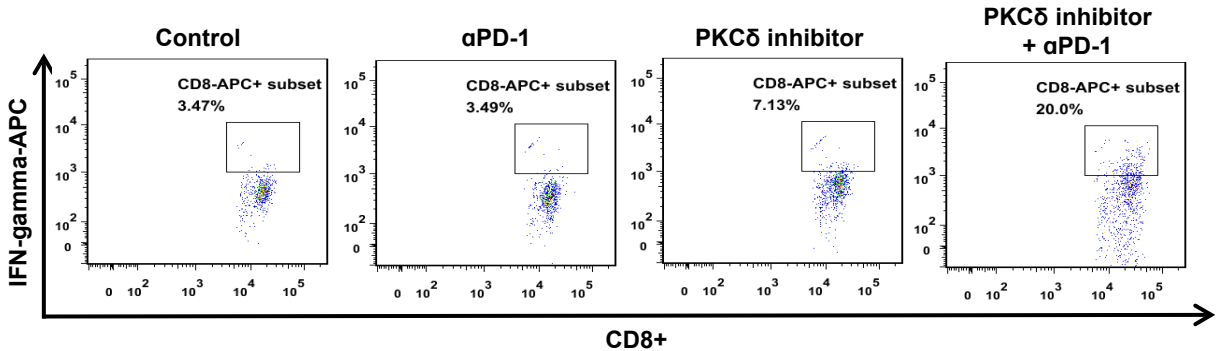

**E**

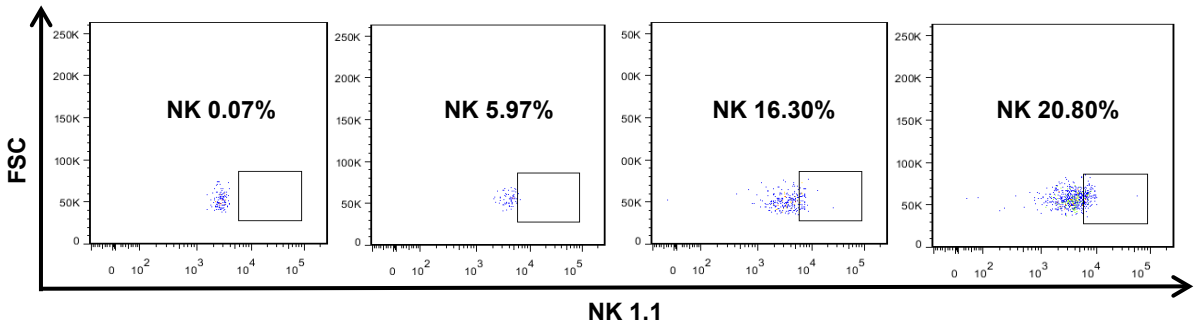

Supplement: MOESM1 [file 23803662]
